# Supplementary material for: A study on elite athletes: Orthorexia nervosa tendency is a risk factor for sleep quality
Source: PeerJ. 2024 Oct 24;12:e18349. doi: 10.7717/peerj.18349 (PMC11512811; doi:10.7717/peerj.18349)
Supplement: Supplemental Information 1 — Between the columns A and H are presented age, weight, height, sex, sports branch, sport tenure, total sleep quality results and orthorexia nervosa tendency. Number 1 in the sports branch column represents individual athletes and number 2 team athletes. [file peerj-12-18349-s001.xlsx]

## Sheet: Untitled2
Age	Weight	Height	Sex	Sports Branch	Sport Tenure	Total_Sleep_Point	Orto_11_total
23	55	175	1	1	10	4	30
22	52	160	1	1	3	3	25
17	48	168	1	1	9	7	27
12	38	162	1	1	6	7	31
21	65	158	1	1	10	8	20
16	46	160	1	1	13	7	24
22	48	168	1	1	15	5	28
14	58	167	1	1	7	1	35
20	45	158	1	1	10	4	26
22	53	170	1	1	5	5	31
21	51	160	1	1	9	8	28
21	45	157	1	1	11	5	25
20	59	173	1	1	5	4	19
23	51	158	1	1	7	8	23
21	60	160	1	1	15	12	36
20	54	158	1	1	12	7	39
17	67	173	1	1	11	7	31
20	57	166	1	2	4	6	26
20	63	165	1	1	10	3	29
21	75	181	1	2	10	5	35
20	75	172	1	2	8	3	16
21	53	170	1	2	8	6	35
21	53	168	1	2	10	6	25
20	53	165	1	1	10	7	20
20	60	170	1	1	5	8	33
19	57	167	1	1	15	7	24
19	51	172	1	1	14	4	26
20	53	174	1	1	12	10	25
19	48	171	1	1	12	13	28
18	52	155	1	1	5	8	26
22	56	165	1	2	1	4	30
25	54	163	1	1	2	3	29
17	56	174	1	1	10	6	21
18	69	178	1	1	9	10	29
21	54	170	1	2	7	4	29
20	55	173	1	2	11	3	31
20	66	166	1	2	7	3	26
20	53	160	1	1	6	5	21
21	73	185	1	2	12	10	22
21	56	175	1	2	12	7	35
20	57	170	1	2	13	5	33
18	54	171	1	2	12	1	33
18	50	160	1	1	7	3	29
18	65	185	1	2	6	2	27
18	66	183	1	2	10	8	32
20	48	162	1	1	12	5	28
38	57	160	1	2	6	1	26
18	50	162	1	2	9	4	30
18	63	175	1	2	7	4	26
18	64	164	1	1	9	4	19
19	55	168	1	1	9	2	25
18	70	174	1	1	11	3	26
21	57	178	1	2	7	3	29
17	54	171	1	1	11	2	21
19	66	176	1	2	7	4	26
21	65	166	1	1	10	3	25
19	62	165	1	2	1	5	25
22	85	163	1	1	11	10	22
20	57	170	1	2	2	9	18
20	58	170	1	2	10	6	26
20	52	168	1	2	2	5	28
20	44	160	1	1	1	7	22
18	53	171	1	2	1	4	25
19	55	158	1	1	1	3	22
19	57	170	1	1	2	5	27
20	54	163	1	2	6	8	20
23	64	160	1	1	3	8	18
18	56	168	1	1	9	4	28
20	55	170	1	2	8	3	41
18	50	170	1	2	2	1	34
18	56	172	1	1	9	7	29
18	55	165	1	2	1	6	23
18	68	182	1	2	6	5	32
19	53	162	1	1	10	5	29
22	48	160	1	1	1	8	36
22	50	165	1	1	7	9	18
22	58	170	1	1	15	9	20
19	57	167	1	1	15	5	30
19	65	169	1	1	5	6	23
18	57	168	1	2	3	5	20
20	52	164	1	1	16	6	29
20	62	166	1	2	10	11	22
19	45	158	1	1	8	7	25
19	62	164	1	2	12	4	29
21	66	182	1	2	9	3	32
22	70	171	1	1	5	5	30
19	62	180	1	2	10	6	34
21	60	168	1	2	7	6	33
20	49	160	1	1	7	7	24
22	57	168	1	2	7	4	25
20	88	182	1	1	7	5	26
19	67	178	1	1	11	7	26
19	50	158	1	1	13	9	18
21	74	178	1	1	6	10	25
19	64	165	1	1	7	5	18
20	65	166	1	1	14	11	26
20	70	170	1	1	6	4	29
22	70	180	1	1	10	4	30
22	55	155	1	1	3	8	30
20	58	175	1	1	4	5	32
19	55	160	1	1	9	10	22
22	46	160	1	2	2	8	31
20	48	159	1	1	8	9	26
19	68	165	1	1	12	5	35
22	48	160	1	1	1	8	36
22	50	165	1	1	7	9	18
22	58	170	1	1	15	9	20
19	57	167	1	1	15	5	30
19	65	169	1	1	5	6	23
18	57	168	1	2	3	5	20
20	52	164	1	1	16	6	29
20	62	166	1	2	10	11	22
19	45	158	1	1	8	7	25
19	62	164	1	2	12	4	29
21	66	182	1	2	9	3	32
19	75	180	2	1	6	3	34
16	70	175	2	1	7	6	30
17	64	177	2	1	9	4	32
16	68	180	2	1	10	8	27
27	90	190	2	1	11	4	25
20	80	175	2	1	12	9	31
22	70	170	2	1	2	4	32
23	78	186	2	1	10	4	30
24	82	174	2	1	13	5	20
20	77	188	2	2	13	6	25
22	68	176	2	1	10	5	32
21	91	190	2	2	9	5	34
22	110	195	2	2	8	8	31
22	73	184	2	2	6	3	27
20	68	177	2	2	9	5	31
22	80	183	2	1	3	4	19
21	78	180	2	1	14	4	19
20	82	167	2	1	12	6	24
21	60	180	2	2	5	8	21
20	80	174	2	1	12	4	22
22	69	170	2	2	1	4	28
32	80	180	2	2	1	3	32
21	73	174	2	1	15	9	27
20	62	180	2	1	10	4	31
20	80	187	2	1	12	4	25
20	80	185	2	2	2	7	30
20	60	178	2	1	8	5	19
20	61	178	2	2	4	2	26
20	71	170	2	2	1	4	35
21	67	175	2	2	1	5	28
21	68	174	2	2	8	3	33
22	63	188	2	1	6	1	24
27	93	173	2	2	5	4	23
18	72	14	2	2	3	4	33
31	77	168	2	2	0.1	6	27
18	95	182	2	1	3	7	18
21	61	165	2	1	1	6	21
18	65	182	2	2	5	2	28
23	72	175	2	1	2	2	22
20	84	173	2	1	4	5	26
18	90	189	2	2	10	6	21
19	84	183	2	2	12	4	25
22	70	178	2	2	7	8	25
22	70	178	2	2	7	8	25
22	70	178	2	2	7	8	25
17	82	183	2	1	10	2	34
18	72	180	2	1	8	6	32
19	75	190	2	2	5	6	24
20	62	180	2	1	7	2	24
18	78	182	2	2	6	3	25
20	86	181	2	1	7	6	25
24	85	183	2	1	10	12	21
21	68	180	2	2	8	7	22
23	81	185	2	2	10	1	20
25	66	172	2	1	8	2	30
21	70	178	2	1	7	4	27
35	71	180	2	1	7	3	33
22	90	189	2	1	13	5	26
21	88	187	2	2	10	4	41
18	89	174	2	2	1	3	32
20	90	172	2	1	11	6	23
18	60	177	2	2	1	5	27
21	90	185	2	2	9	2	33
23	75	182	2	2	9	2	25
18	83	191	2	2	8	1	31
18	80	184	2	2	12	5	27
21	97	183	2	2	12	7	25
18	65	160	2	1	8	7	28
18	75	179	2	1	6	7	27
20	78	178	2	1	14	6	25
21	108	190	2	1	6	7	24
18	97	188	2	2	10	4	34
18	74	178	2	2	6	0	24
17	73	185	2	2	8	4	27
18	85	196	2	2	6	6	26
19	83	185	2	2	9	3	31
19	86	189	2	2	6	4	25
19	86	189	2	2	6	4	25
18	72	178	2	2	4	10	29
19	80	180	2	2	7	3	31
24	62	170	2	1	10	5	29
22	75	182	2	1	15	14	30
18	110	195	2	1	7	13	35
20	80	190	2	2	3	7	27
20	95	188	2	2	9	2	25
20	71	170	2	2	4	6	32
20	64	184	2	1	14	6	28
19	65	173	2	1	9	6	41
21	94	196	2	2	12	5	24
22	104	180	2	1	8	5	27
21	58	167	2	1	12	6	27
20	77	177	2	1	6	6	28
19	96	205	2	2	6	4	29
19	80	187	2	2	9	10	22
19	73	180	2	2	4	5	26
20	76	180	2	1	10	6	17
21	75	178	2	1	9	5	21
20	80	185	2	1	10	8	27
19	75	188	2	2	5	4	38
23	62	181	2	1	4	7	24
19	77	176	2	1	15	6	29
26	86	184	2	1	4	7	14
21	125	190	2	1	7	6	32
24	55	160	2	2	7	5	27
22	75	180	2	2	12	6	21
20	60	173	2	1	12	6	32
22	93	190	2	1	15	6	30
25	95	191	2	2	10	8	22
20	80	178	2	1	10	4	25
20	76	180	2	2	7	4	24
20	60	180	2	2	7	2	27
19	74	172	2	2	6	6	21
19	75	176	2	2	8	2	25
21	100	174	2	1	5	5	35
21	78	187	2	1	9	3	31
22	86	178	2	2	8	11	28
22	80	185	2	2	12	2	31
22	114	182	2	2	3	7	20
24	62	170	2	1	10	5	29
22	75	182	2	1	15	14	30
18	110	195	2	1	7	13	35
20	80	190	2	2	3	7	27
20	95	188	2	2	9	2	25
20	71	170	2	2	4	6	32
20	64	184	2	1	14	6	28
19	65	173	2	1	9	6	41
21	94	196	2	2	12	5	24
22	104	180	2	1	8	5	27
21	58	167	2	1	12	6	27
20	77	177	2	1	6	6	28
19	96	205	2	2	6	4	29
19	80	187	2	2	9	10	22
19	73	180	2	2	4	5	26
20	76	180	2	1	10	6	17
